# Supplementary material
Source: publisher site journal article supplement (https://www.dovepress.com/article/300165)
Supplement: Supplementary file 1 [file get_supplementary_file.php]

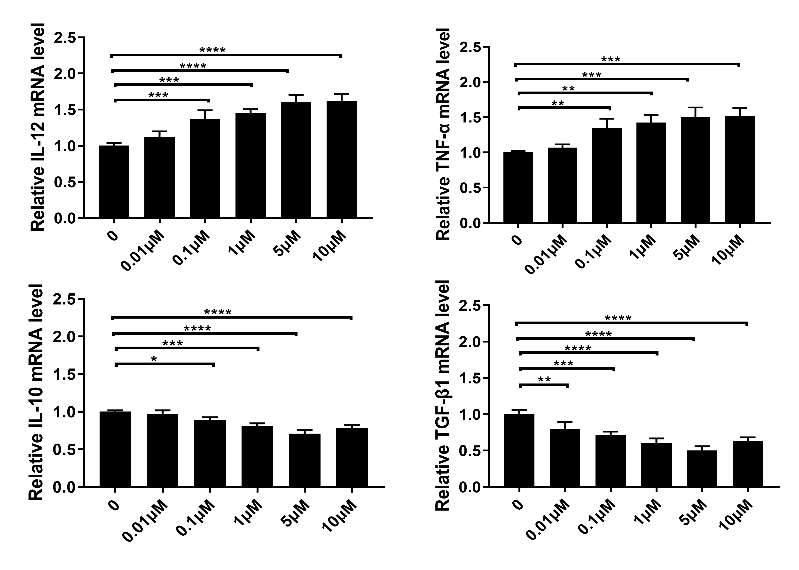


**Fig. S1: Maraviroc skewed THP-1 macrophages toward an M1-like phenotype and its effect reached a maximum when the concentration of maraviroc is 5 μM.** To confirm the function of maraviroc on macrophage plasticity, various concentrations of maraviroc (0-10 μM) were used to culture THP-1 M0 macrophages for 24 hours. qRT-PCR analyses showed that maraviroc significantly upregulated the expression of IL-12 and TNF-α (markers for M1-polarized macrophages) and downregulated the expression of TGF-β1 and IL-10 (markers for M2-polarized macrophages) at mRNA level. This effect reached a maximum when the concentration of maraviroc is 5 μM. Since increasing the concentration of maraviroc to 10 μM did not induce better effects, all experiments were conducted using the concentration of 5 μM for maraviroc. Values represented mean ± standard deviation from 3 independent experiments. **P* < 0.05; ***P* < 0.01; ****P* < 0.001; *****P* < 0.0001.


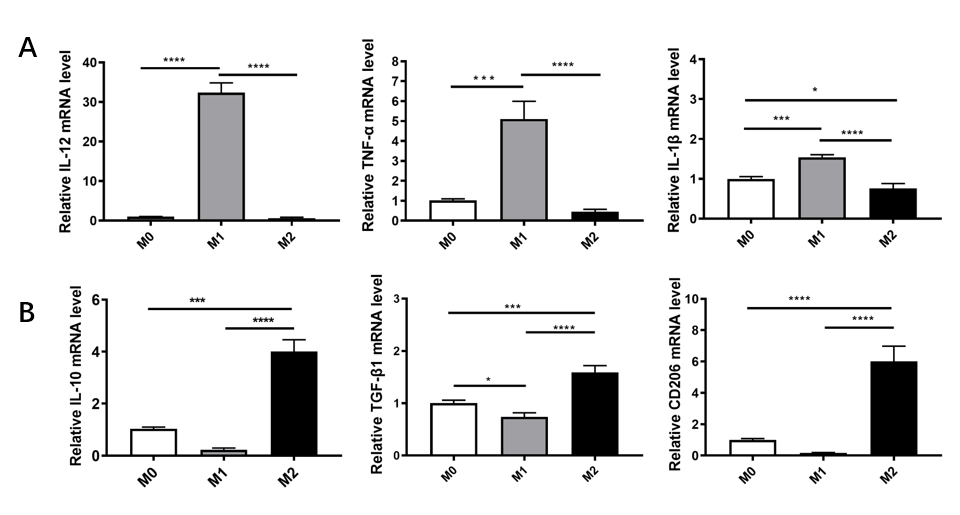


**Fig. S2：qRT-PCR analyses of the expression of markers of M1- (A) and M2- (B) phenotype macrophages.** Human THP-1 monocytes were differentiated into THP-1 M0 macrophages by incubating with PMA (100 ng/mL) for 48 hours (white bars, labeled as M0). To obtain THP-1 M1 macrophages (M1, gray bars), THP-1 M0 macrophages were next incubated with LPS (100 ng/mL) and IFN-γ (20 ng/mL) for 24 hours. THP-1 M2 phenotype macrophages were obtained by incubation with IL-4 (20 ng/mL) and IL-13 (20 ng/mL) for 24 hours (M2, black bars). THP-1 M0 macrophages and M2-polarized macrophages both had significantly lower levels of IL-12, TNF-α and IL-1β, and higher levels of IL-10, TGF-β1, and CD206 compared with that of M1-polarized THP-1 macrophages. Values represented mean ± standard deviation from 3 independent experiments. **P* < 0.05; ****P* < 0.001; *****P* < 0.0001.

**Table S1 Primer sequences**

| Gene | Primer sequences (5’-3’) |
| --- | --- |
| SOCS3 | forward primer：CCTGCGCCTCAAGACCTTC |
|  | reverse primer：GTCACTGCGCTCCAGTAGAA |
| TGF-β1 | forward primer：CCACCTGCAAGACCATCGAC |
|  | reverse primer：CTGGCGAGCCTTAGTTTGGAC |
| IL-12 | forward primer：ACCCTGACCATCCAAGTCAAA |
|  | reverse primer：TTGGCCTCGCATCTTAGAAAG |
| TNF-α | forward primer：GAGGCCAAGCCCTGGTATG |
|  | reverse primer：CGGGCCGATTGATCTCAGC |
| IL-10 | forward primer：GACTTTAAGGGTTACCTGGGTTG |
|  | reverse primer：TCACATGCGCCTTGATGTCTG |
| β-actin | forward primer：AGAGCTACGAGCTGCCTGAC |
|  | reverse primer：AGCACTGTGTTGGCGTACAG |
| CCL5 | forward primer：CCAGCAGTCGTCTTTGTCAC |
|  | reverse primer：CTCTGGGTTGGCACACACTT |
| CCR5 | forward primer：TTGCCAAACGCTTCTGCAAAT |
|  | reverse primer：AGTGGATCGGGTGTAAACTGA |

**Table S2 siRNA sequences**

| **siRNA** | **Sequence (5’-3’)** |
| --- | --- |
| Negative control | UUCUCCGAACGUGUCACGU |
| si-CCL5 #1 | GCUGUCAUCCUCGUUGCUATT |
| si-CCL5 #2 | GGGAGUACAUCAACUCUUUTT |
| si-CCL5 #3 | AAGGAAGUCAGCAUGCCUCUA |
| si-SOCS3 #1 | CCUGGACUCCUAUGACAAATT |
| si-SOCS3 #2 | CCAAGAACCUGCGCAUCCATT |
| si-SOCS3 #3 | AGAGCCUAUUACAUCUACUTT |
